# Supplementary material for: A Novel Spore Wall Protein from Antonospora locustae (Microsporidia: Nosematidae) Contributes to Sporulation
Source: PubMed Central journal article supplement (PMC5697631; doi:10.1111/jeu.12410), 2017-04-10
Supplement: JEU-64-779-s001.pdf [file JEU-64-779-s001.pdf]

## SUPPORTING INFORMATION

### A Novel Spore Wall Protein from *Antonospora locustae* (Microsporidia: Nosematidae) Contributes to Sporulation by Longxin Chen, Runting Li, Yinwei You, Kun Zhang, Long Zhang

**Fig. S1.** The results of semi-quantitative PCR for the detection of RNAi of *AlocSWP2*. M: DNA molecular weight marker. 1: *A. locustae actin*; 2: RNAi of *A. locustae actin*; 3: *AlocSWP2*; 4: RNAi of *AlocSWP2*.

**Table S1.** Numerical data of qRT-PCR to check the results of RNAi of *AlocSWP2*.

**Table S2.** Raw data of the survival assay after RNAi of *AlocSWP2*.

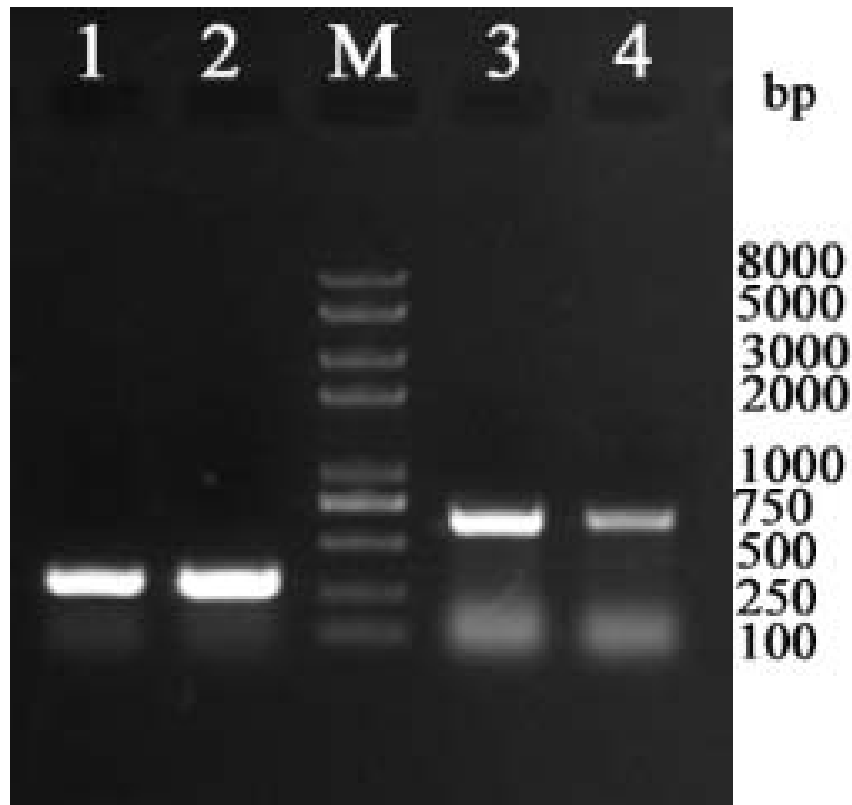

**Table S1.** Numerical data of qRT-PCR to check the results of RNAi of *AlocSWP2*.

| Sample | Ct<br>( <i>AlocSWP2</i> ) | Ct<br>( <i>actin</i> ) | Ct<br>( <i>AlocSWP2-actin</i> ) | Ct mean<br>( <i>AlocSWP2</i> ) | Ct SEM<br>( <i>AlocSWP2</i> ) | Ct mean<br>( <i>actin</i> ) | Ct SEM<br>( <i>actin</i> ) | $\Delta$ Ct mean<br>( <i>AlocSWP2-actin</i> ) | $\Delta$ Ct SEM<br>( <i>AlocSWP2-actin</i> ) | $2^{-\Delta\Delta Ct}$<br>mean |
|--------|---------------------------|------------------------|---------------------------------|--------------------------------|-------------------------------|-----------------------------|----------------------------|-----------------------------------------------|----------------------------------------------|--------------------------------|
| RNAi   | 24.567                    | 20.494                 | 3.872                           |                                |                               |                             |                            |                                               |                                              |                                |
|        | 24.575                    | 21.321                 | 3.880                           | 24.559                         | 0.021                         | 20.695                      | 0.553                      | 3.8637                                        | 0.574                                        |                                |
|        | 24.536                    | 20.271                 | 3.841                           |                                |                               |                             |                            |                                               |                                              |                                |
| CK     | 19.995                    | 21.2                   | -1.12                           |                                |                               |                             |                            |                                               |                                              | 26.100                         |
|        | 19.613                    | 21.107                 | -1.51                           | 20.276                         | 0.840                         | 21.118                      | 0.077                      | -0.8423                                       | 0.916                                        |                                |
|        | 21.22                     | 21.048                 | 0.102                           |                                |                               |                             |                            |                                               |                                              |                                |



|    |   |   |
|----|---|---|
| 17 | 1 |   |
| 17 | 1 |   |
| 17 | 1 |   |
| 17 | 1 |   |
| 18 | 1 |   |
| 18 | 1 |   |
| 18 | 1 |   |
| 18 | 1 |   |
| 18 | 1 |   |
| 18 | 1 |   |
| 18 | 1 |   |
| 18 | 1 |   |
| 18 | 1 |   |
| 18 | 1 |   |
| 19 | 1 |   |
| 19 | 1 |   |
| 19 | 1 |   |
| 19 | 1 |   |
| 19 | 1 |   |
| 19 | 1 |   |
| 20 | 1 |   |
| 20 | 0 |   |
| 20 |   |   |
| 9  |   |   |
| 10 |   |   |
| 11 |   |   |
| 12 |   |   |
| 13 |   | 1 |
| 14 |   | 1 |





9  
10  
11  
12  
13  
14  
15  
16  
17  
18  
19  
19  
19  
19  
19  
19  
19  
20  
20  
9  
10  
11  
12  
13  
14  
15  
15  
15

0  
0  
0  
0  
0  
0  
0  
0  
0  
0  
0  
0  
0  
0  
0  
0  
0  
0  
0

1  
1  
1  
1

|    |   |
|----|---|
| 15 | 1 |
| 15 | 1 |
| 16 | 1 |
| 16 | 1 |
| 16 | 1 |
| 16 | 1 |
| 16 | 1 |
| 16 | 1 |
| 16 | 1 |
| 16 | 1 |
| 16 | 1 |
| 16 | 1 |
| 16 | 1 |
| 16 | 1 |
| 16 | 1 |
| 17 | 1 |
| 17 | 1 |
| 17 | 1 |
| 17 | 1 |
| 18 | 1 |
| 18 | 1 |
| 18 | 1 |
| 19 | 1 |
| 19 | 1 |
| 19 | 1 |
| 20 | 1 |

---
